# Supplementary material
Source: publisher figshare collection journal article supplement (https://tandf.figshare.com/articles/dataset/_/3502838)
Supplement: Supplementary file 1 [file 1 › Supplementary material.docx]

**Supplementary material**

**Ionic liquid-assisted synthesis of Bi12TiO20 nanostructures and their visible-light photocatalytic performance**

**J. F. Ren, J. Z. Li and Z. W. Song***

**1. The selected area electron diffraction (SAED) patterns of the obtained Bi12TiO20 nanoparticles.**

**
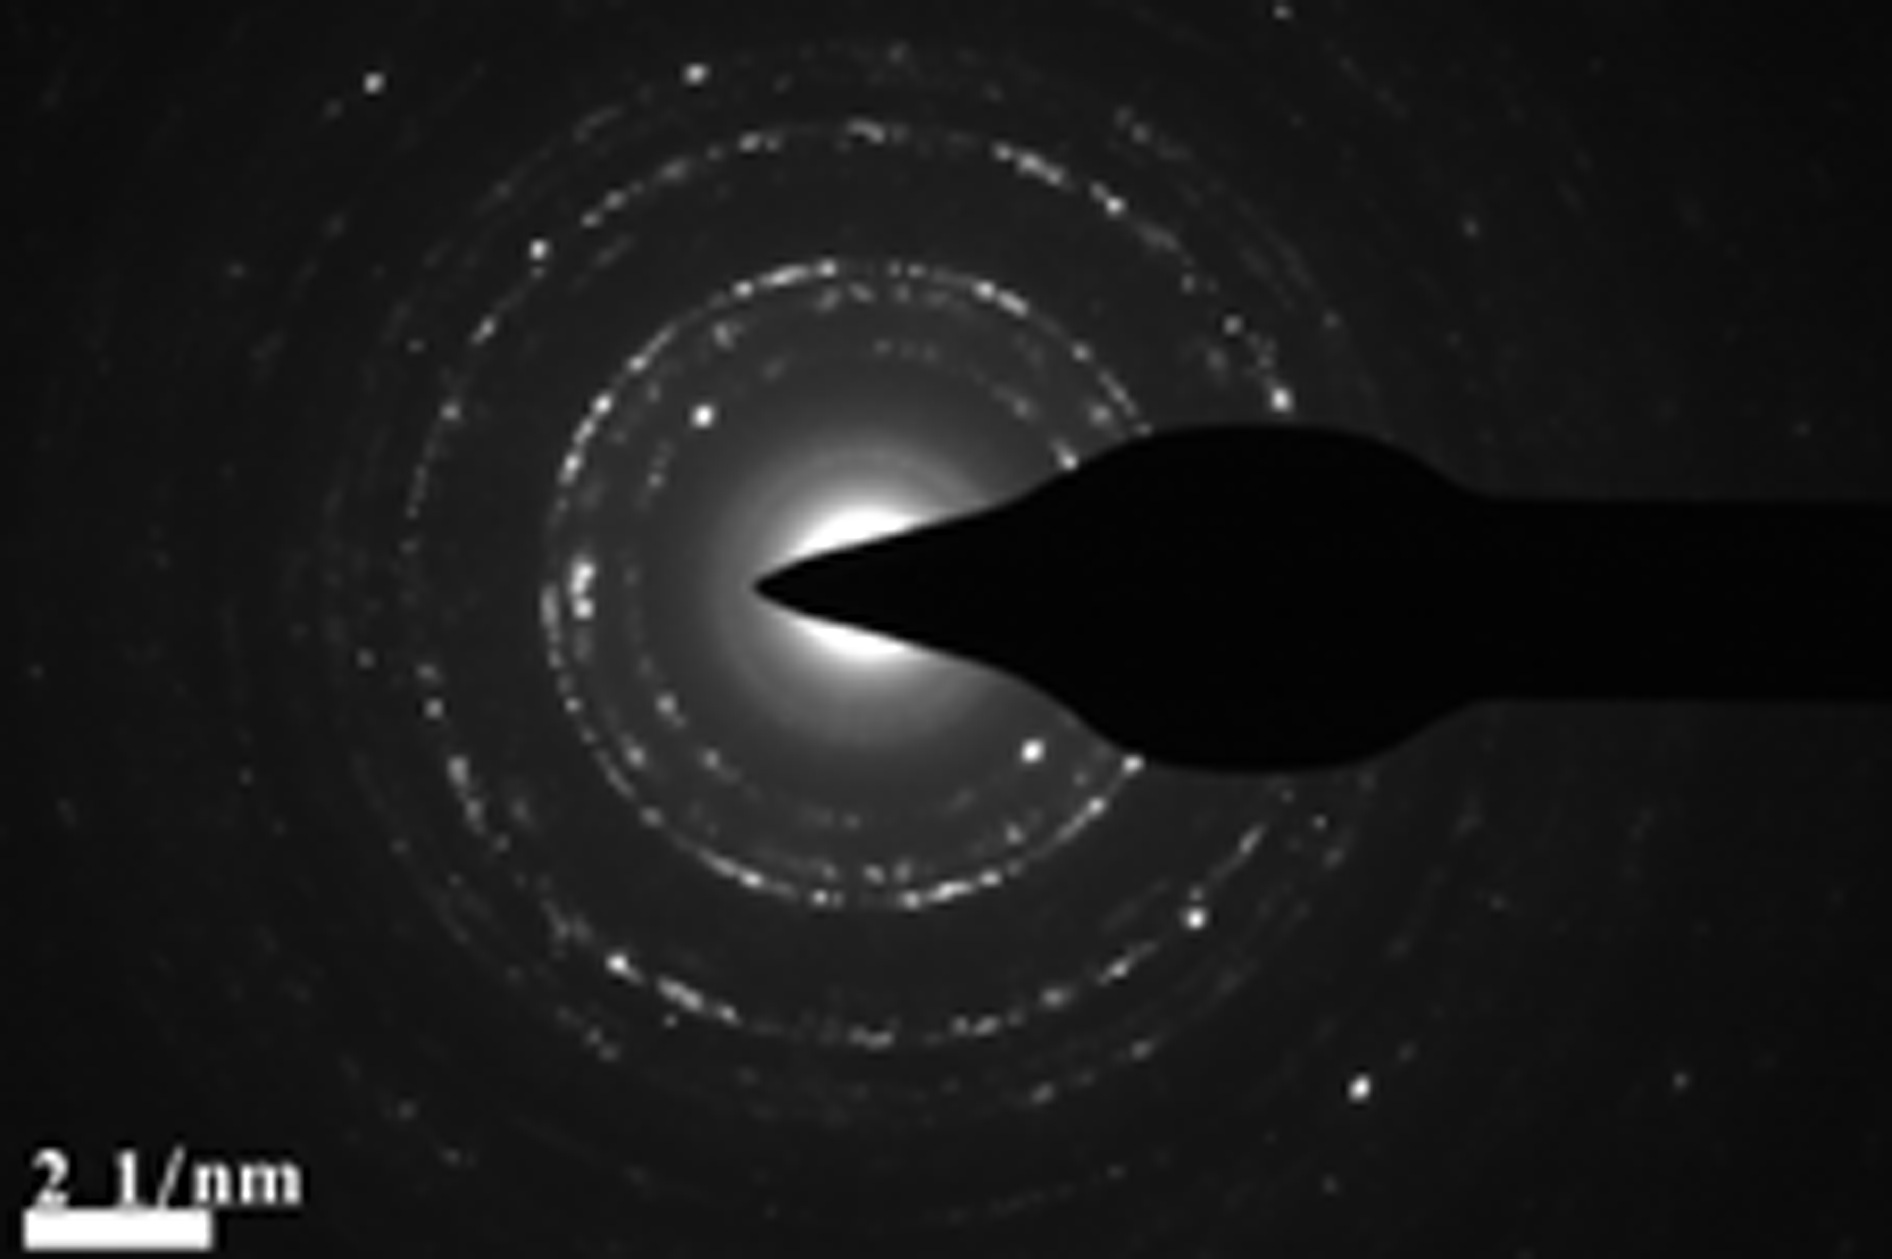
**

Fig. S1 The selected area electron diffraction (SAED) patterns of the obtained Bi12TiO20 nanoparticles.

School of Chemistry and Pharmaceutical Science, Qingdao Agricultural University, Qingdao 266109, China

* Corresponding author, e-mail: cataszw@hotmail.com

**2. BET surface area of Bi12TiO20 nanoparticles, nanorods and raft-like one.**

**

**

Fig. S2 N2 adsorption-desorption isotherms of Bi12TiO20 nanoparticles, nanorods and raft-like one.
