# Supplementary material
Source: publisher figshare collection journal article supplement (https://tandf.figshare.com/articles/dataset/_/3502838)
Supplement: Supplementary file 1 [file 1 › Supplementary material.pdf]

## Supplementary material

### Ionic liquid-assisted synthesis of $\text{Bi}_{12}\text{TiO}_{20}$ nanostructures and their visible-light photocatalytic performance

J. F. Ren, J. Z. Li and Z. W. Song\*

1. The selected area electron diffraction (SAED) patterns of the obtained  $\text{Bi}_{12}\text{TiO}_{20}$  nanoparticles.

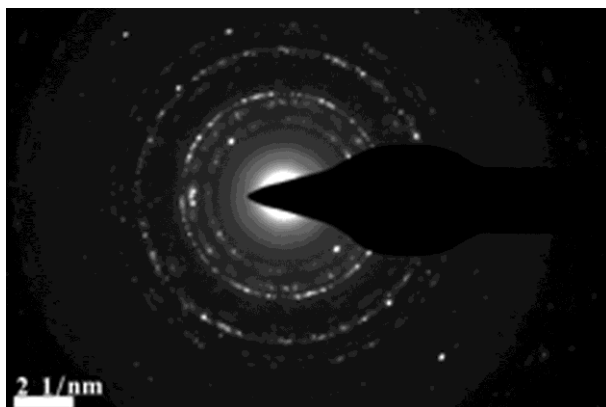

Fig. S1 The selected area electron diffraction (SAED) patterns of the obtained  $\text{Bi}_{12}\text{TiO}_{20}$  nanoparticles.

## 2. BET surface area of $\text{Bi}_{12}\text{TiO}_{20}$ nanoparticles, nanorods and raft-like one.

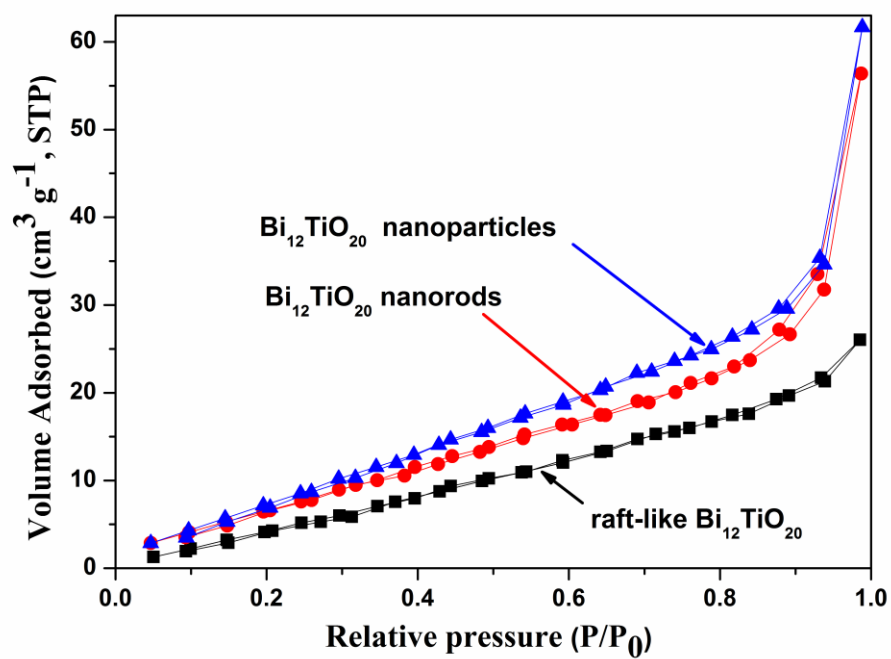

Fig. S2 N<sub>2</sub> adsorption-desorption isotherms of  $\text{Bi}_{12}\text{TiO}_{20}$  nanoparticles, nanorods and raft-like one.
